# Supplementary material for: Photo-induced chemical vapour generation with formic acid: novel interface for high performance liquid chromatography-atomic fluorescence spectrometry hyphenated system and application in speciation of mercury
Source: Royal Society of Chemistry journal article supplement (doi:10.1039/b701514c), 2007-01-01
Supplement: suppmat.doc [file suppmat.doc]

**Electronic supplementary information**

Photo-induced chemical vapor generation with formic acid: novel interface for high performance liquid chromatography-atomic fluorescence spectrometry hyphenated system and application in speciation of mercury

Yong-guang Yin, Jing-fu Liu, Bin He, Er-le Gao, Gui-bin Jiang*

State Key Laboratory of Environmental Chemistry and Ecotoxicology, Research Center for Eco-Environmental Sciences, Chinese Academy of Sciences, P.O. Box 2871, Beijing 100085, China. Fax: +86-10-62849179; Tel: +86-10-62849334; E-mail: [gbjiang@rcees.ac.cn](mailto:gbjiang@rcees.ac.cn)

**Figures**


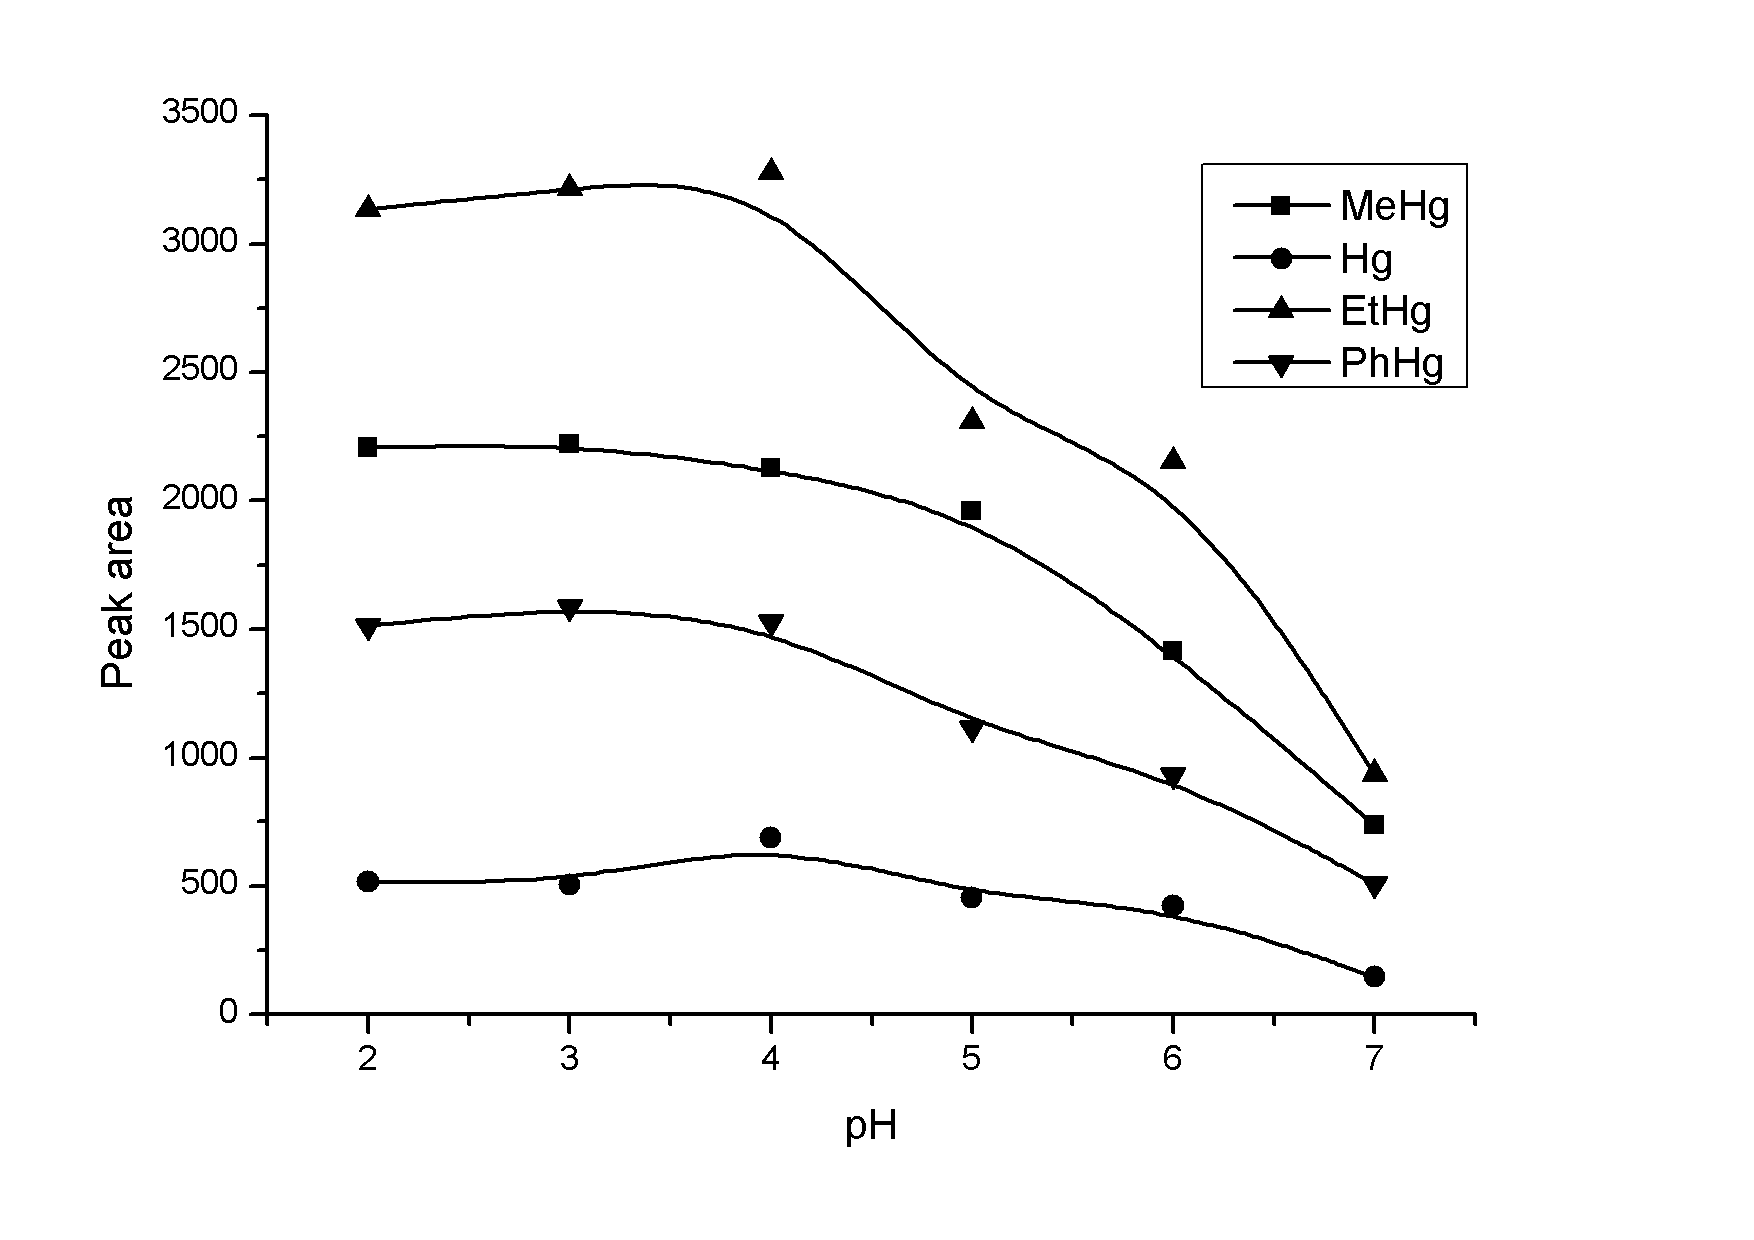


**Fig. S1** Effect of pH on the fluorescence intensities of mercury compounds. Concentration of mercury species: 100 μg L-1. Flow rate of formic acid: 3.1 mL min-1. Other conditions were given in Table 1.


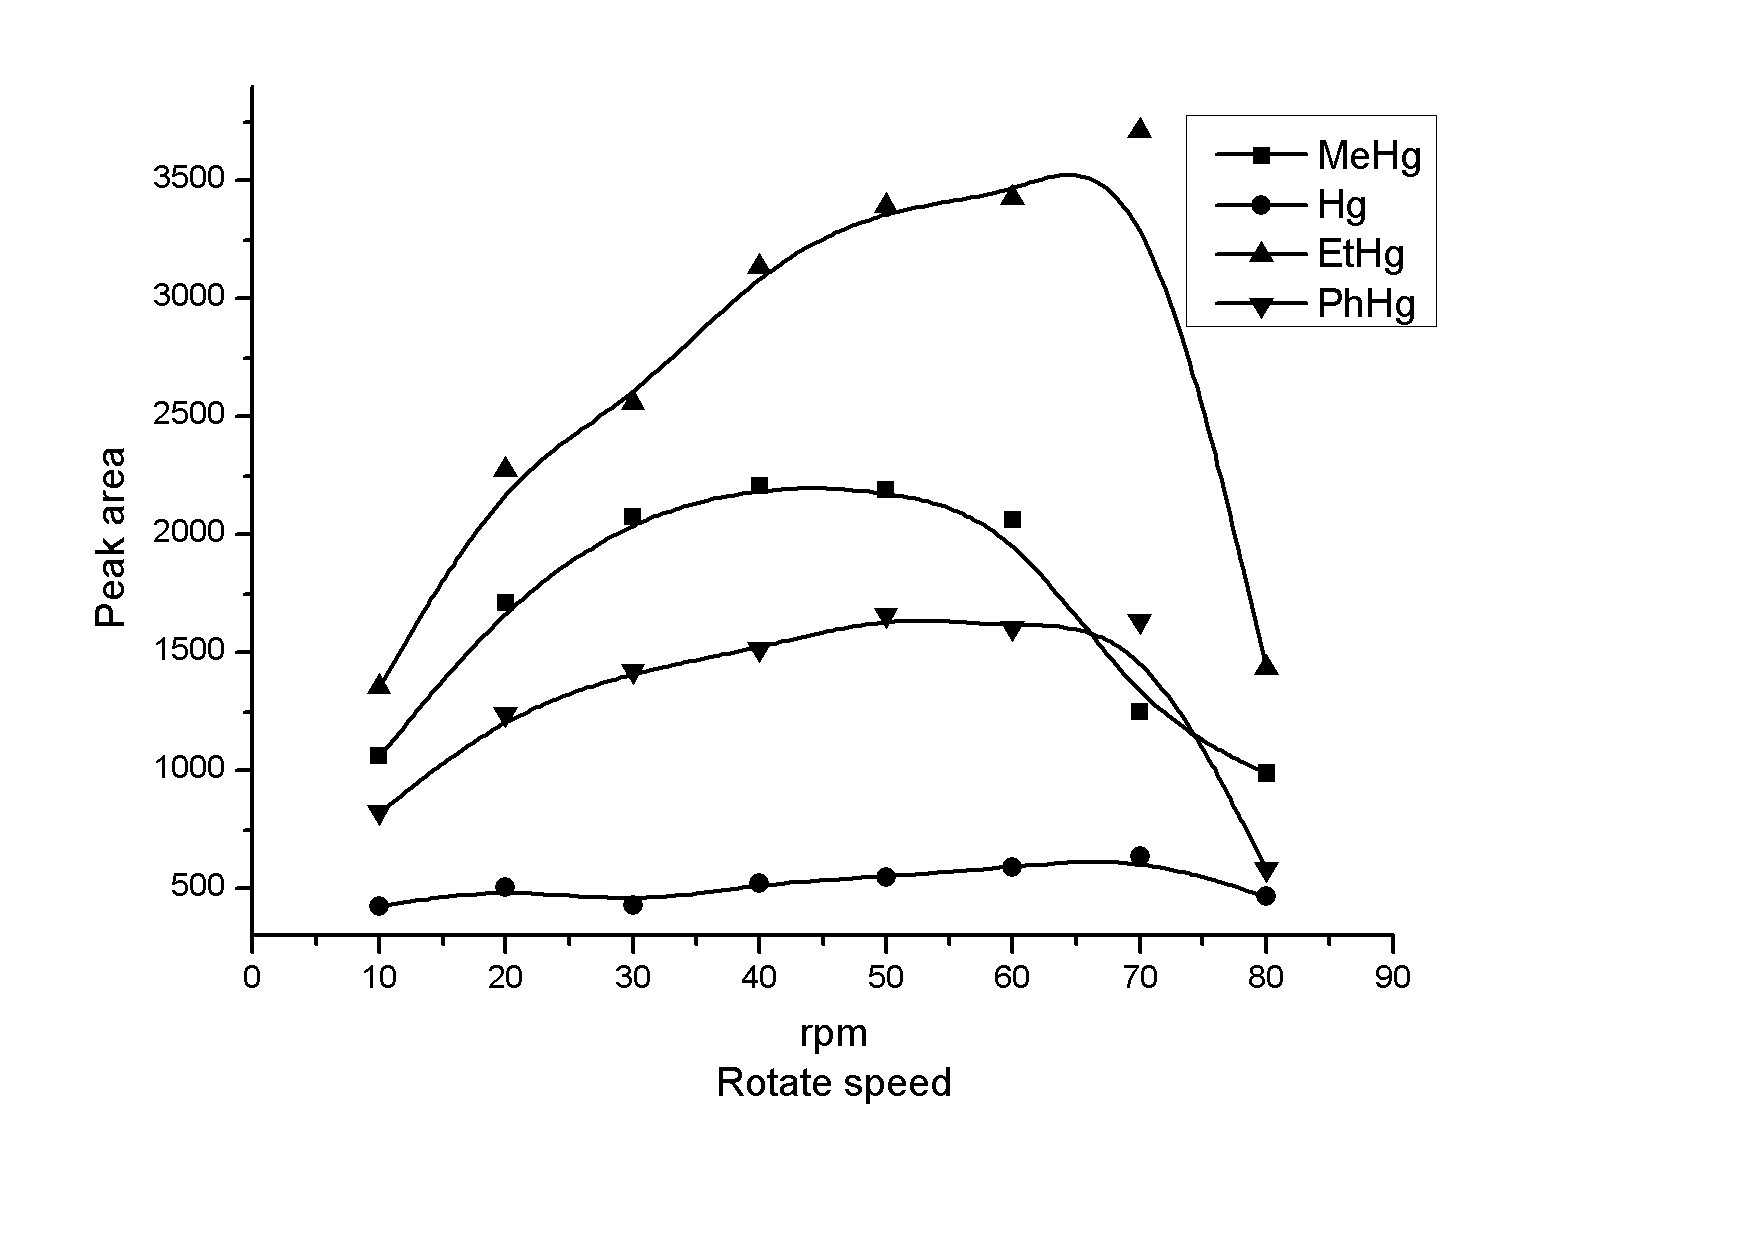
**Fig. S2** Effect of flow rate of formic acid on the fluorescence intensities of mercury compounds. Concentration of mercury species: 100 μg L-1. Other conditions were given in Table 1.


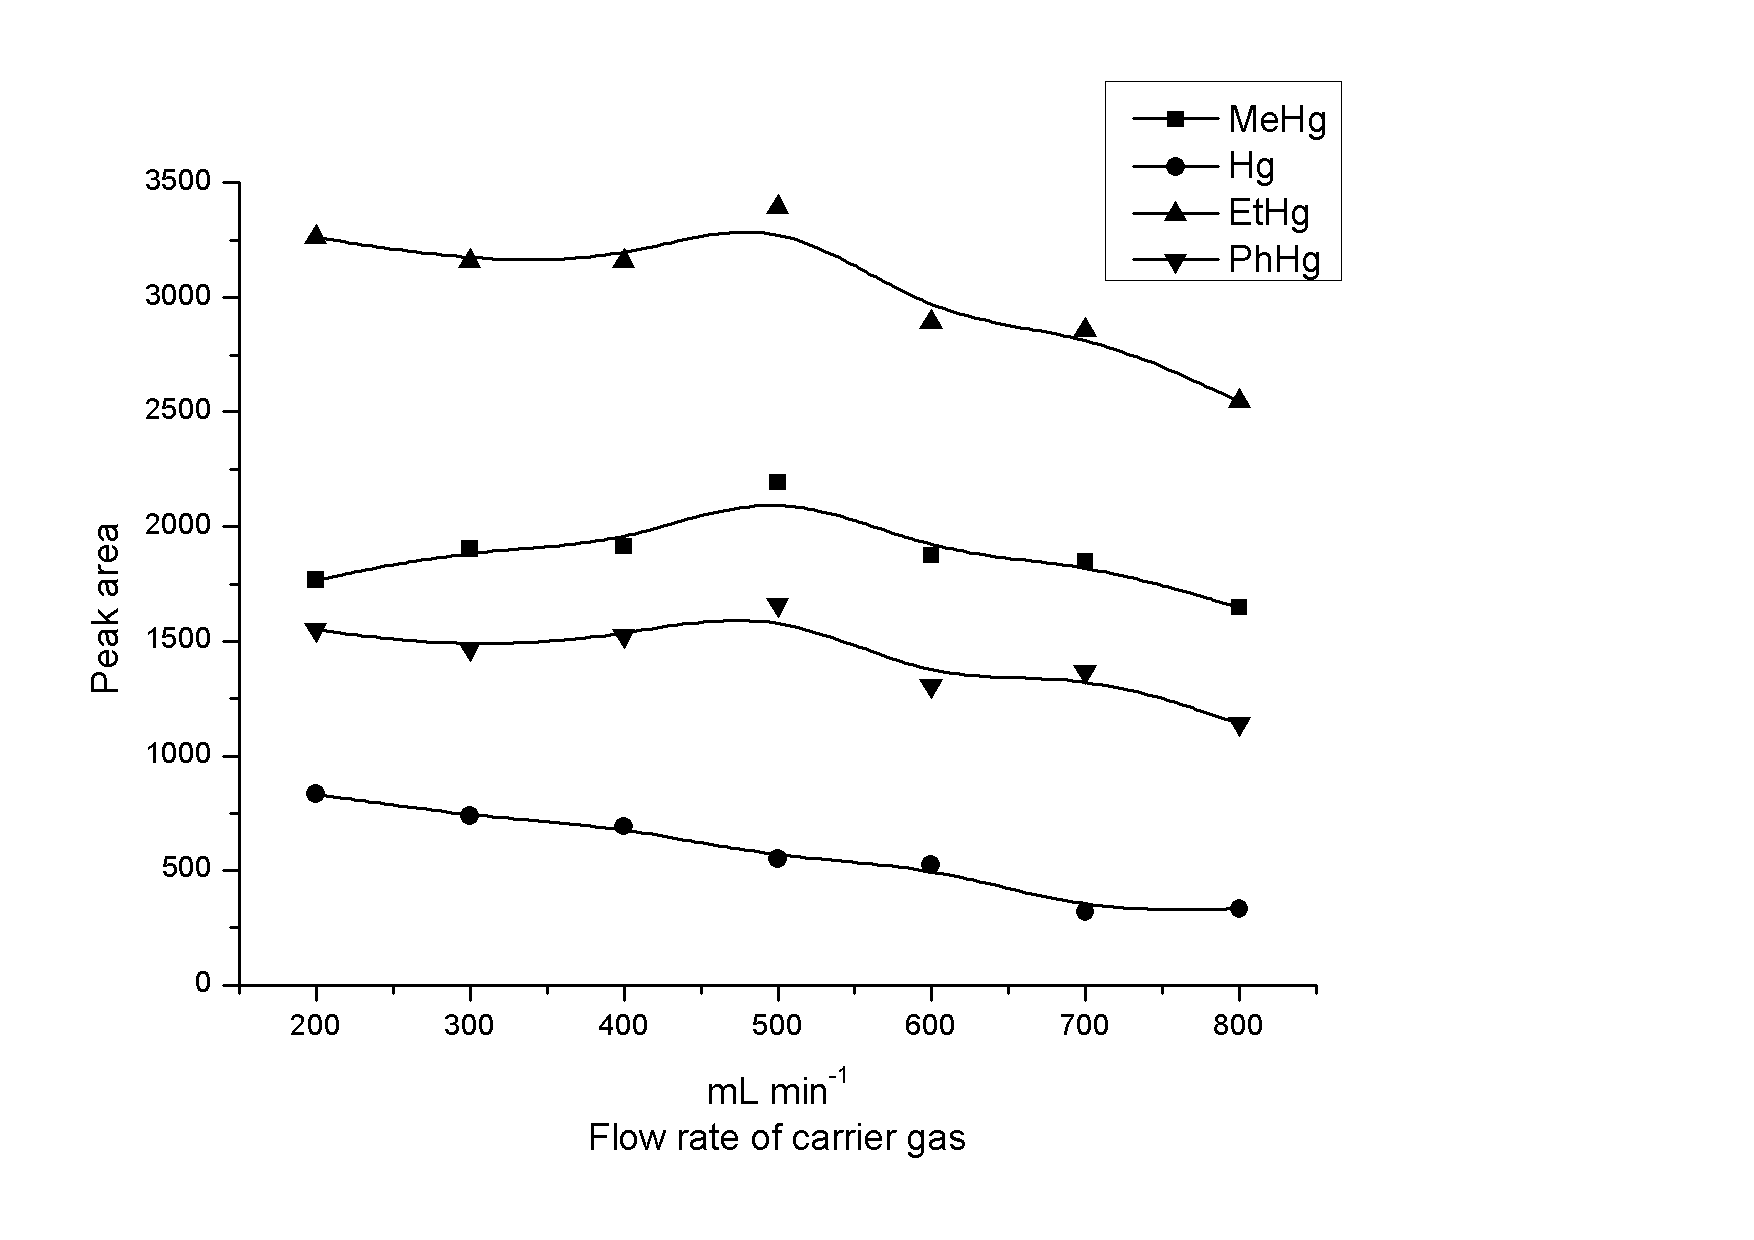
**Fig. S3** Effect of flow rate of carrier gas on the fluorescence intensities of mercury compounds. Concentration of mercury species: 100 μg L-1. Other conditions were given in Table 1.


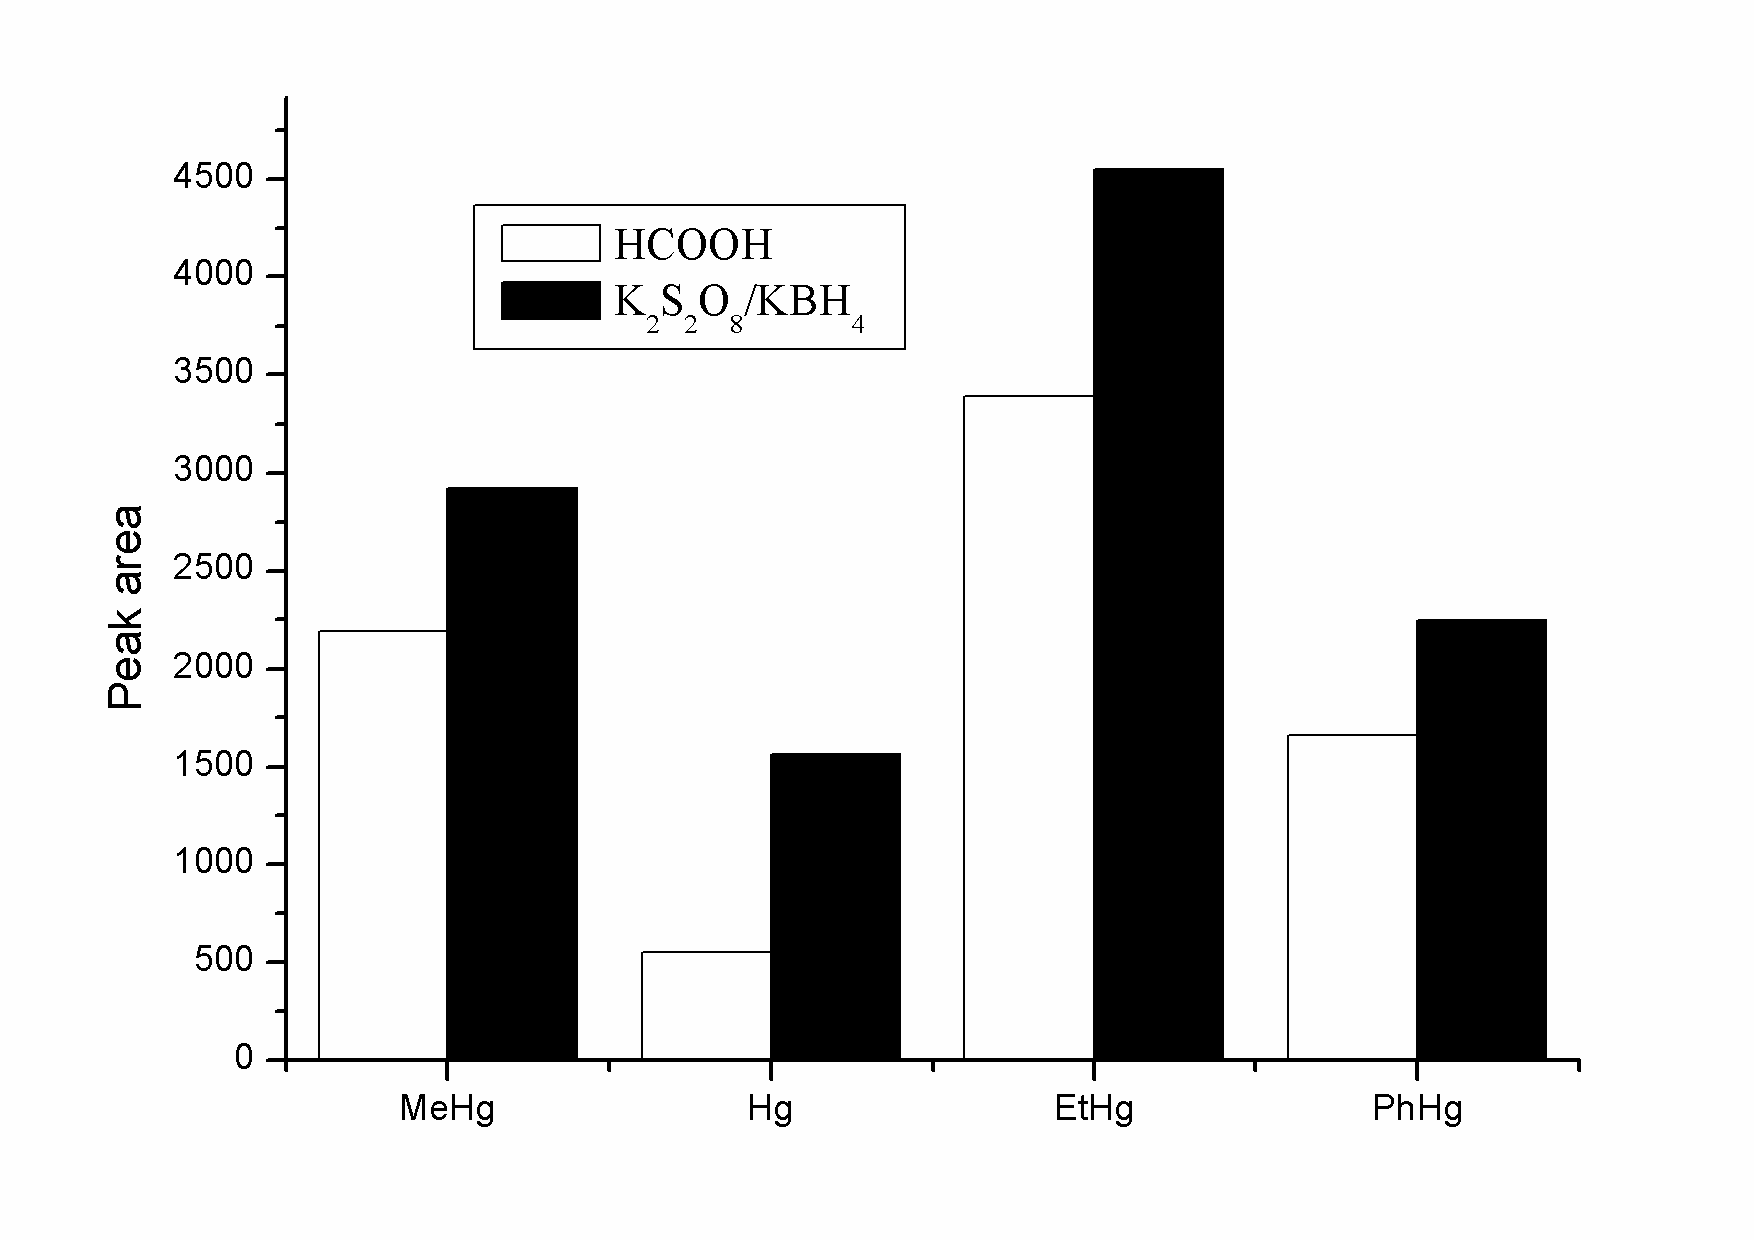


**Fig.** S4 Fluorescence intensities of mercury compounds obtained using the UV K2S2O8/ KBH4 CVG system and the proposed UV CVG system


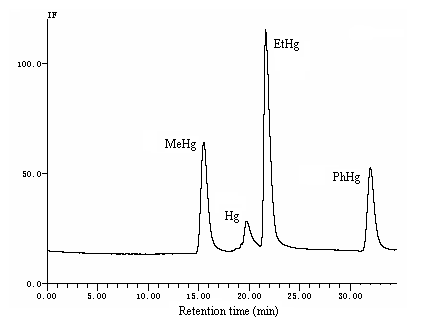


**Fig.** S5 Chromatogram of four mercury species using the developed HPLC-UV-CVG-AFS system. Concentration of mercury species: 100 μg L-1.
